# Supplementary material
Source: PubMed Central journal article supplement (PMC4134879)
Supplement: NIHMS522995-supplement-supplement_1.pdf [file NIHMS522995-supplement-supplement_1.pdf]

## SUPPLEMENTARY MATERIAL

**Supplementary Table I.** Baseline demographic and clinical characteristics by estimated glomerular filtration rate (eGFR) among patients with a recent ischemic stroke (n=18666)

| Characteristic                          | eGFR<br>< 60 mL · min <sup>-1</sup> · 1.73 m <sup>-2</sup><br>( n=3893 ) | eGFR<br>≥ 60 mL · min <sup>-1</sup> · 1.73 m <sup>-2</sup><br>( n=14773 ) |
|-----------------------------------------|--------------------------------------------------------------------------|---------------------------------------------------------------------------|
| <b>Demographics</b>                     |                                                                          |                                                                           |
| Age,— yr                                | 69.2 ± 8.6                                                               | 65.2 ± 8.3                                                                |
| Female sex, n (%)                       | 1944 (50.0%)                                                             | 4762 (32.2%)                                                              |
| <b>History, n (%)</b>                   |                                                                          |                                                                           |
| Hypertension                            | 3197 (82.1%)                                                             | 10652 (72.1%)                                                             |
| Diabetes                                | 1242 (31.9%)                                                             | 4080 (27.6%)                                                              |
| Hyperlipidemia                          | 1770 (45.6%)                                                             | 6847 (46.4%)                                                              |
| Coronary artery disease                 | 862 (22.1%)                                                              | 2144 (14.5%)                                                              |
| Myocardial infarction                   | 327 (8.4%)                                                               | 880 (6.0%)                                                                |
| Current smoking                         | 602 (15.5%)                                                              | 3405 (23.0%)                                                              |
| Prior Stroke/TIA*                       | 1102 (28.3%)                                                             | 3467 (23.5%)                                                              |
| Congestive heart failure                | 151 (3.9%)                                                               | 345 (2.3%)                                                                |
| <b>Medications n (%)</b>                |                                                                          |                                                                           |
| Antithrombotic                          | 2522 (64.8%)                                                             | 9582 (64.9%)                                                              |
| Statin                                  | 1838 (47.2%)                                                             | 6956 (47.1%)                                                              |
| Antihypertensive                        | 2941 (75.5%)                                                             | 9548 (64.6%)                                                              |
| <b>Biomarkers/scores</b>                |                                                                          |                                                                           |
| Mean systolic BP — mmHg                 | 145.7 ± 16.8                                                             | 143.9 ± 16.4                                                              |
| Mean diastolic BP — mmHg                | 83.5 ± 10.9                                                              | 84.1 ± 10.4                                                               |
| Median qualifying stroke NIHSS          | 3.0 ± 3.0                                                                | 2.8 ± 2.9                                                                 |
| <b>Qualifying stroke sub-type n (%)</b> |                                                                          |                                                                           |
| Cardioembolic                           | 96 (2.5%)                                                                | 237 (1.6%)                                                                |
| Large vessel atherosclerosis            | 1179 (30.3%)                                                             | 4184 (28.3%)                                                              |
| Small vessel occlusion                  | 1933 (49.7%)                                                             | 7797 (52.8%)                                                              |
| Other                                   | 65 (1.7%)                                                                | 286 (2.0%)                                                                |
| Unknown                                 | 617 (15.9%)                                                              | 2259 (15.3%)                                                              |

\*Prior to study qualifying stroke; eGFR=estimated glomerular filtration rate; TIA=transient ischemic attack; BP=blood pressure; NIHSS=National Institutes of Health Stroke Scale score; HDL=high density lipoprotein

**Supplementary Table II.** Absolute risk of recurrent vascular events by baseline estimated glomerular filtration rate (eGFR) among 18,666 patients with a recent ischemic stroke.

| <b>Variable (s)</b>                                   | <b>eGFR &lt; 60 (mL/min)</b> | <b>eGFR ≥ 60 mL/min</b> | <b>p-value</b> |
|-------------------------------------------------------|------------------------------|-------------------------|----------------|
| Number of Patients                                    | 3893                         | 14773**                 |                |
| Stroke, N (Percentage; 95% CI)                        | 414 (10.6; 9.7–11.6)         | 1214 (8.2; 7.8–8.7)     | < 0.001        |
| Fatal Stroke, N (Percentage; 95% CI)                  | 37 (1.0; 0.7 – 1.3)          | 99 (0.7; 0.5–0.8)       | 0.067          |
| Myocardial Infarction, N (Percentage; 95% CI)         | 87 (2.2; 1.8–2.7)            | 206 (1.4; 1.2–1.6)      | < 0.002        |
| Death (vascular cause), N (Percentage; 95% CI)        | 175 (4.5; 3.8–5.2)           | 311 (2.1; 1.9–2.3)      | < 0.001        |
| Death (any cause), N (Percentage; 95% CI)             | 446 (11.5; 10.5–12.5)        | 859 (5.8; 5.4–6.2)      | < 0.001        |
| Stroke, MI, or vascular death, N (Percentage; 95% CI) | 676 (17.4; 16.2–18.6)        | 1731 (11.7; 11.2–12.2)  | < 0.001        |

\* First occurrence of non-fatal event. MI=myocardial infarction. Fatal stroke is defined as death of vascular cause occurring within 28 days of stroke.

\*\* One patient with outcome missing.

**Supplementary Table III.** Frequency of chronic kidney disease (CKD) stages by incidence of vascular events

| <b>Chronic Kidney Disease Stage</b> | <b>Frequency</b> | <b>Any Stroke</b> | <b>Stroke, myocardial infarction, vascular death</b> |
|-------------------------------------|------------------|-------------------|------------------------------------------------------|
| 1                                   | 4814             | 370 (7.7 %)       | 534 (11.1%)                                          |
| 2                                   | 9958             | 844 (8.5 %)       | 1197 (12.0%)                                         |
| 3                                   | 3790             | 399 (10.5%)       | 647 (17.1%)                                          |
| 4                                   | 103              | 15 (14.6%)        | 29 (28.2%)                                           |
